# Supplementary material
Source: Springer Nature journal article supplement (https://www.springermedizin.de/resource/supplementary/12916_2012_718_MOESM11_ESM.pdf/9598740)

**a Brain (Morin)**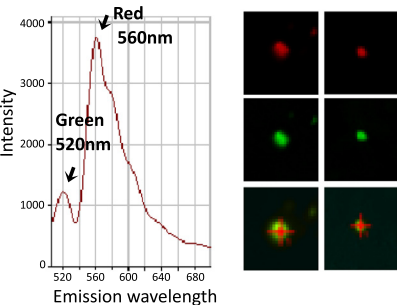**b Brain (PIXE)**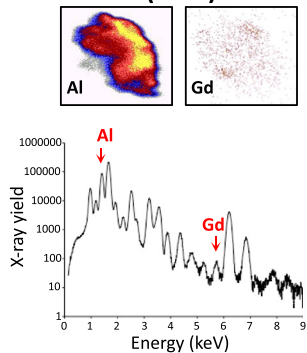**c brain**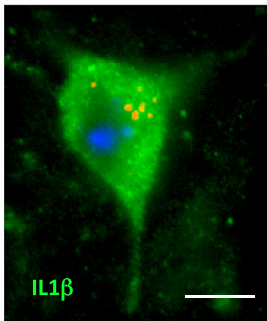**d**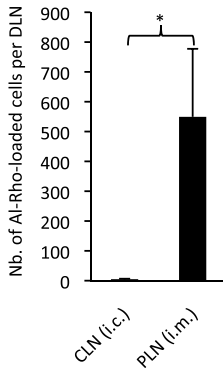**e**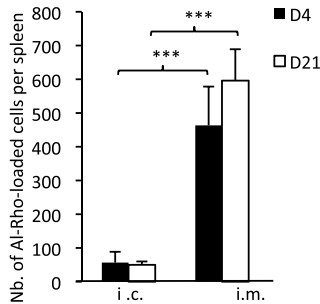

Supplement: MOESM11 [file 9598740]
